# Supplementary material for: Transcriptional Signatures of Immune, Neural, and Endocrine Functions in the Brain and Kidney of Rainbow Trout (Oncorhynchus mykiss) in Response to Aeromonas salmonicida Infection
Source: MDPI journal article supplement (doi:10.3390/ijms23031340), 2022-01-25
Supplement: s1 [file s1]

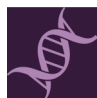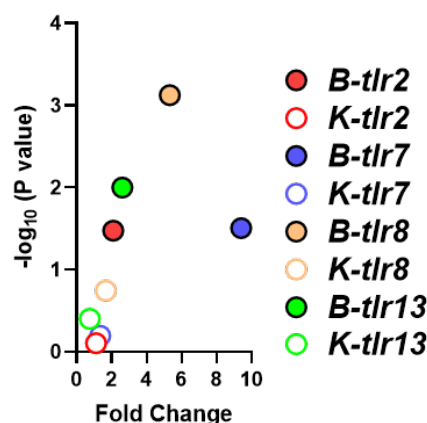

Figure S1. Expression profiles of tlr2, tlr7, tlr8 and tlr13. B indicates brain and K indicates kidney.

|                | signal peptides                                                                   |     |
|----------------|-----------------------------------------------------------------------------------|-----|
| Human          | -----MGPGVLLLLVATAWHGQIPVIEPS-----VPELV                                           | 31  |
| Mouse          | -----MELGPPPLVLLATVWHGQAPVIEPS-----GPELV                                          | 31  |
| Zebrafish      | -----MFFALLFLIGILLGQVQG-WEPRIRLSSGALAGTDVI                                        | 37  |
| Trout csf-1ra1 | -----MELYLAFLGILPTAAQ-EWRPFVILKNSVVGSEVV                                          | 37  |
| Trout csf-1ra2 | MLDPYSLVRSDLTTLVKTSTDEITTLRDIQYTSQTSWKRSRMVLYLAFLGILPTAAQQRHPVILKNSQLVVGSEVV      | 80  |
| Trout csf-1rb2 | -----MLFLALFLGIMLC-TAQERSPPVIRLNSVLLREART                                         | 36  |
| Trout csf-1rb1 | -----MLLIALLLGIMVCCTAQEQSPFVIRLNSVLLREAVWT                                        | 37  |
| Human          | VKPGAT-VTLRCVNGSVWDGPPSPHWTLYSDGSSSILSTN--NATFQNTGTTCRTEP---GDPLGGSAAHLYVKDPA     | 105 |
| Mouse          | VEPGET-VTLRCVNGSVWDGPISPYWTLDPESPGSLTTR--NATFKNTGTTCRTEL---EDPMAGSTTHLYVKDPA      | 105 |
| Zebrafish      | LESGSP-LQLVCEGDGPVTFPLRLAKHKRYISKEVGKIRSFVRVEKTTVDFTGYKCVY--MNGMDSNLSSSVHVEVRDSR  | 114 |
| Trout csf-1ra1 | LNPGRP-LVLRCEGDGPVNWLRSLKSHKSLISKNGRVRTFKVDRPSAEHTGTTCYCEYTSVNVKVRDLSTVHVVKDPA    | 116 |
| Trout csf-1ra2 | LNPGRP-LVLRCEGDGPVNWLRSLKSHKRFISKVGRVRTFVRPSAEHTGTTCYCEYTSVNVKQNLSTVHVVKDPA       | 159 |
| Trout csf-1rb2 | LLLGTS-FTLTCEGDSTATWSTAFK-RR--NSKQGSVITTR--YLTADYTGTYMCVYD----NQPDLFSEVHIYVKDPN   | 106 |
| Trout csf-1rb1 | IPVGTSSFTLTCEGYSTVWSTTAFKLMR--KTRLGSVITTR--RLTVDTGTGYKCMYE----NQPDLLSEVHIYVKDPH   | 109 |
| Human          | RPWNVLAQEVVVF--EDQDALLPCLLTDPLVLEAGVSLVRVGRPLMRHTNYSFSPWHGFTIHRAKFIQSQDYQCSALMGG  | 183 |
| Mouse          | HSWNLLAQEVTVV--EGQEAIVLPCCLITDPALKDSVLMREGGRQVLRKTVYFFSPWRGFIIRKAKVLDSNTYVCKTMVNG | 183 |
| Zebrafish      | VLFVSPSTSLRVVRKEGEDLLPCLLTDPEATD-FTFRMDNGSAAPYGMNITVDPRKGVILRNVPNGNADYICCARIGG    | 193 |
| Trout csf-1ra1 | SLFWTSASLRVVRKEGEDHLLPCLLTDPEATD-LGLRMDNCTFVPPGMNITADPRRGILIRNLHPSYNADYVCSAKLHG   | 195 |
| Trout csf-1ra2 | SLFWTSSTSLRVVRKEGENYLLPCLLTDPEATD-LGLRMDNCTSVPPGMNITADPRRGILIRNLHPSYNADYVCSAKLHG  | 238 |
| Trout csf-1rb2 | NVLVTPRNRDV--EEGDILL-CQLTDPATD-MSLHMANGDPTPPDMNVTNPRRGILIRNLHPSYNADYVCSAKING      | 182 |
| Trout csf-1rb1 | NILVTPRTLGDV--KEGSDVLL-CQLTNFIATD-LSVRMANGDPTPPDMNVTNPKRGILIRLYLLTSHSADYVCSAKING  | 185 |
| Human          | RKVMISIRLKVQKVIQFPALTLPFAELVRIRGEAAQIVCSASSVDVNFVFLQHNTK--LAIPQSDFHNNRYQKV        | 260 |
| Mouse          | RESTSTGIWLVKVRNHPPEPPQIKLEPSKLVIRGEAAQIVCSATNAEFGFNVILKRGDTK--LEIPNSDFQDNYYKVK    | 260 |
| Zebrafish      | AEKVSIFSIINIQLRFPFYPYVLRKNEYVKLGERLQISCTTNPNFYNNVTHSSRMLPKAEKSTMEG-D-LRAIE        | 271 |
| Trout csf-1ra1 | VERTSKTFMLNIQLRFPFYPYVLEKDEYVHIVGEKLSIHCTHNNPNFYNNVTHSSRMLPKAEKSTMEG-D-LRAIE      | 274 |
| Trout csf-1ra2 | VERTSKAFSINIQLRFPFYPYVLEKDEYVHIVGEKLSIHCTHNNPNFYNNVTHSSRMLPKAEKSTMEG-D-LRAIE      | 316 |
| Trout csf-1rb2 | VTTRSKDITINVQRLRWPPSVLIEVDGYVIVGEELRIPCITSNPNHFYNNVTHSSRMLPKAEKSTMEG-D-LRAIE      | 259 |
| Trout csf-1rb1 | VTKVSKVPIFVQSLRPLPSVLIEVNGYVIRIYGEQLLIPCITSNPNHFYNNVTHSSRMLPKAEKSTMEG-D-LRAIE     | 265 |
| Human          | LTLNLDQVDFQHAGNYSVCVASNVQGHSTSMFFRVVESAYLNLSE-----QNLIEQVTVGEGNLKVMVEAYPGLQG      | 333 |
| Mouse          | RALSNAVDQDAGIYSCVASNDVGRTRTATMNFQVVESAYLNLSE-----QSLLEQVTVGEGNLKVMVEAYPGLQG       | 333 |
| Zebrafish      | SILTIPSVQLSHTGNITCTGNEAGANSSTTQLLVVEEPIRLSPKLSSKLTHRGLSIEVSEGDDVDLGLVLEIAYPPLTS   | 351 |
| Trout csf-1ra1 | SILTIPVVDQSDTGNITCTGNEAGVNSSTTSLIVVEEPIRLSPQLSSKLHQAQSLSDVNEGEDLKLVLIEAYPQITG     | 354 |
| Trout csf-1ra2 | SILTIPAVDQSDTGNITCTGNEAGVNSSTTSLIVVEEPIRLSPQLSSKLHQAQSLSDVNEGEDLKLVLIEAYPQITG     | 396 |
| Trout csf-1rb2 | STVTIPAVTMSDTGNITCTAMNEAGASRSTIYLEVVDPEYIRFIRPLSPNLYQNGSLVNVKEGENLEISLIEIAYPQIKK  | 339 |
| Trout csf-1rb1 | SSVTIPAVAMSHGTGNITCTAMNEAGFNSSTTYLQVVDKPYMRLIPRLSPDLYNGSLVNEGENLEINIQIEAYPQIME    | 345 |
| Human          | FNWYTLGPFSDHQPEPKLANA-TTKDYRHTFTLSLPLKPSSEAGYSFLARNPGGWRLTFELTLRYPPEVSIVWTFIN     | 412 |
| Mouse          | YNWYTLGPFSDHQPEPKLANA-TTKDYRHTFTLSLPLKPSSEAGYSFLARNPGGWRLTFELTLRYPPEVSIVWTFIN     | 410 |
| Zebrafish      | HKWET--PTSHNASLPENRFF--NHNDRYEALLLLKRLNFEEIGQYTLNVKNSMKSASITFDIQMYTKPVAVRWENVT    | 426 |
| Trout csf-1ra1 | QHWAT--PTA--SSTQEQTFT--RYINRYSATLLKRLNFEEIGQYTLNVKNSMKSASITFDIQMYTKPVAVRWENVT     | 427 |
| Trout csf-1ra2 | QSWDT--PTS--SPTQEHIPT--RYINRYSATLLKRLNFEEIGQYTLNVKNSMKSASITFDIQMYTKPVAVRWENVT     | 469 |
| Trout csf-1rb2 | HWWDV--FMSHSQNIETHGDTWTAQDNRRYESSLLHVRVSEERGQYTLHTRSTRLNSITFTIQMYTKPVAVRWENVT     | 417 |
| Trout csf-1rb1 | QWWDI--FMSHNHNISTHDDTNAVFRNRRYESSLLHVRVSEERGQYTLHTRSTRLNSITFTIQMYTKPVAVRWENVT     | 423 |
| Human          | GGSTLLCAASGYQPNTWLQCSGHTDRCDQAQVLQVWD---DPYPEVLSQEPFFHKVTQVSLTIVETLEHNQTYECRAHN   | 489 |
| Mouse          | GSDVLFCDVSGYPQPSVTWMECRGHTDRCDQAQVLQVWN---DTHPEVLSQKPFDKVLIQSLPIGTILKHNMTYFCKTHN  | 487 |
| Zebrafish      | ---TLSCRSYGYPPAPILWYQCTGIRTTCPENTDLQ---PIQTQVTFEQKESFGAVGVESVLTVGP-NRRMTVVCVAFN   | 499 |
| Trout csf-1ra1 | ---TLTCTSFYGPAPILWYQCSGIRTTCPENATGLQMPAPLLAQTVQVEQREYGVGVQVSLTIVETLEHNQTYECVAFN   | 504 |
| Trout csf-1ra2 | ---SLMCTSFYGPAPILWYQCSGIRATCENNTGLQMPAPLLAQTVQVEQREYGVGVQVSLTIVETLEHNQTYECVAFN    | 546 |
| Trout csf-1rb2 | ---TLTCTSSGYPAPTILWYQCPGIQNSACDADNDTVEVQ-PLFTSTMEVQSE-----LTLSPSTEEFTVECVTFN      | 483 |
| Trout csf-1rb1 | ---TLTCTASGYPAPTILWYQCPGIQNTCDGNDTVEVQ-PLLTSTMEVQSE-----LTLSPSTMEVTFVECVTFN       | 489 |

|                | transmembrane domains                                                               |      |
|----------------|-------------------------------------------------------------------------------------|------|
| Human          | SVSGSGWAFIP-ISAGAHTHPPDEFLFTPVVACMSIMALLLLLLLLLLLYKYKQPKYQVRWKIIIESYEGNSYTFIDPTQ    | 568  |
| Mouse          | SVGNSSQYFRA-VSLGQSKQLPDSESLFTPVVACMSVMSLLVLLLLLLLLLYKYKQPKYQVRWKIIERYEGNSYTFIDPTQ   | 566  |
| Zebrafish      | LVGGGSDTFMSMEV-----SDQIFTSAMCGSTVAMVVLGILLIFMIYKYKQPKRYEIRWKIIETATNGNNYTFIDPTQ      | 570  |
| Trout csf-1ra1 | LVGVGKDTFAMDV-----SNIMFTSTLLGAAGVLALLLLLLLMVLLLYKYKQPKRYEIRWKIIQASGEGNNYTFIDPTQ     | 575  |
| Trout csf-1ra2 | LAGVGKDTFAMEV-----SDKVFTSTLGAAGVLAFLILLIILLYKYKQPKRYEIRWKIIQASGEGNNYTFIDPSQ         | 617  |
| Trout csf-1rb2 | FAGKNRDI FISHVVAATSKTFVTESELTFTPLIGATSTALLFLLLVIVLYKYKQPKRYEVRWKIMEANDGNNYTFIDPTQ   | 563  |
| Trout csf-1rb1 | LVGKERDIFVLRVPAATLPTFATPKLFTPTFIGATSTATILLFLLLVIVLYKYKQPKRYEVRWKIIANDGNNYTFIDPTQ    | 569  |
| Human          | LPYNEKWEFFPRNNLQFGKTLGAGAFGKVVEATAYGLGKEDA-VLKVAVMLKSTAHADKEALMSELKIMSHLGQHENIV     | 647  |
| Mouse          | LPYNEKWEFFPRNNLQFGKTLGAGAFGKVVEATAYGLGKEDA-VLKVAVMLKSTAHADKEALMSELKIMSHLGQHENIV     | 645  |
| Zebrafish      | LPYNEKWEFFPRDKLKLGLKTLGAGAFGKVVEATAYGLGKEDN-ITRVAVMLKASAHDPDEREALMSELKILSHLGQHKINIV | 649  |
| Trout csf-1ra1 | MPYNEKWEFFPRDKLKLGLKTLGAGAFGKVVEATAYGLGEDDN-AMRVAVMLKARAHSDEREALMSELKILSHLGQHKINIV  | 654  |
| Trout csf-1ra2 | LPYNEKWEFFPRDKLKLGLKTLGAGAFGKVVEATAYGLGEDDN-AIRVAVMLKARAHSDEREALMSELKILSHLGQHKINIV  | 696  |
| Trout csf-1rb2 | LPYNEKWEFFPRDKLKLGLKTLGAGAFGKVVEATAYGLGTDNMTTRVAVMLKPSAHSEEREALMSELKILSHLGCHDNIV    | 643  |
| Trout csf-1rb1 | LPYNEKWEFFPRDKLKLGLKTLGAGAFGKVVEATAYGLGTDNMTTRVAVMLKPSAHSEEREALMSELKILSHLGSHDNIV    | 649  |
| Human          | NLLGACTHGGFVLVITEYCCYGDLLNFLRRKAEAMLGPSLS-PGQD-----PEGGVDYKNHLEKKYVRSDSGFSSQGV      | 721  |
| Mouse          | NLLGACTHGGFVLVITEYCCYGDLLNFLRRKAEAMLGPSLS-PGQD-----SEGDSYKNHLEKKYVRSDSGFSSQGV       | 719  |
| Zebrafish      | NLLGACTHGGFVLVITEYCCYGDLLNFLRRKAEAMFLNFMIPN-----FPEPMTDYKNVSTERMFRSDSGISSCTSD       | 723  |
| Trout csf-1ra1 | NLLGACTQAGFVLVITEYCSHGDLNFLRHQKETFLNFMNIPA-----VPEETSDYKNLCEGKQFIRSDSGISSVCS        | 728  |
| Trout csf-1ra2 | NLLGACTQAGFVLVITEYCSHGDLNFLRHQKETFLNFMNMP-----VPEETSDYKNVCEGKQFIRSDSGISSVSS         | 770  |
| Trout csf-1rb2 | NLLGACTQGGPMLMITEYCSHGDLNFLRGKAKFLDLSILSGFG-----IPGNSDHYKNVCSQSRVSDSGISSCSS         | 717  |
| Trout csf-1rb1 | NLLGACTQGGFMLMITEYCSYGDLLNFLHGKAKFLYSIPRPGTPEVPRVFNHNDHYKNVCAQESRVRSDSGISSCSS       | 729  |
| Human          | TYVEMRP---VSTSSNDSFSEQDLKEDGRPLELRDILLHFSSQVAQGMFLASKNCIHRDVAARNVLLTNGHVAKIDGF      | 797  |
| Mouse          | TYVEMRP---VSTSSNDSFSEQDLKEDGRPLELRDILLHFSSQVAQGMFLASKNCIHRDVAARNVLLTNGHVAKIDGF      | 795  |
| Zebrafish      | HYLDMPVTSRPTNSALDSSECEQ---DSWPLDMDDLRFSSQVAQGLDFLAAKNCIHRDVAARNVLLTNSRVAKICDF       | 800  |
| Trout csf-1ra1 | SYLEMRP-GPQFVNSSLDSV---CEDGGPDSWPLDMDDLRFSSQVAQGLDFLAAKNCIHRDVAARNVLLTDLHVAKICDF    | 805  |
| Trout csf-1ra2 | SYLEMRP-GPQFVNSSLDSL---CEEGGPDSWPLDMDDLRFSSQVAQGLDFLAAKNCIHRDVAARNVLLTDRRVAKICDF    | 847  |
| Trout csf-1rb2 | NYQDMHP-ARRPKYCFMGS---CEDPETDWTLLDMEDLLRVSYQVAQGMFLASKNCIHRDVAARNVLLTDGHVAKICDF     | 794  |
| Trout csf-1rb1 | NFLDTHP-AQRPKHCFMGS---CEDPETGTWSLDIEDLLRFSSQVAQGMFLASKNCIHRDVAARNVLLTDGRVAKICDF     | 806  |
| Human          | GLARDIMNDSNIVKGNARLPVKWMAPEIFDCVYTVQSDVWSYGILLWEIFSLGLNFPYGPILVNSKPYKLVKDGQMAQ      | 877  |
| Mouse          | GLARDIMNDSNIVVKGARLPVKWMAPEIFDCVYTVQSDVWSYGILLWEIFSLGLNFPYGPILVNNKPYKLVKDGQMAQ      | 875  |
| Zebrafish      | GLARDIMNDSNIVVKGARLPVKWMAPEIFECVYTVQSDVWSYGIMLWEIFSLGKSPYPILVDSKPYKMIKCGYQMSR       | 880  |
| Trout csf-1ra1 | GLARDIMNDSNIVVKGARLPVKWMAPEIFDCVYTVQSDVWSYGILLWEIFSLGKSPYPILVDTKPYNMKICGYQMSR       | 885  |
| Trout csf-1ra2 | GLARDIMNDSNIVVKGARLPVKWMAPEIFDCVYTVQSDVWSYGILLWEIFSLGKSPYPILVDTKPYNMIESGYQMSR       | 927  |
| Trout csf-1rb2 | GLARDIENDSNIVVKGARLPVKWMAPEIFDCVYTVQSDVWSYGILLWEIFSLGKSPYPINIVDTKPYNMKIDGCHMSQ      | 874  |
| Trout csf-1rb1 | GLARDIENDSNIVVKGARLPVKWMAPEIFECVYTVKSDVWSYGILLWEIFSLGKSPYPINIVDTKPYNMKIDGCHMSQ      | 886  |
| Human          | PAFAPKNIYSIMQACWALEPHTPTFQQICSLFQEQAQ---DRRE-----RDYTNLPSS-----SRSGSGSSSSSE         | 941  |
| Mouse          | PVFAPKNIYSIMQSCWDLPTTRPTFQQICFLQEQAQ---ERRD-----QDYANLPSSGGSGSGSGSGSGSSSE           | 946  |
| Zebrafish      | PDFAPPEMYTIMKMCWNLEPTERTPTFSKISQMLIQLGETSEQQD-----TQYKNIP-TEAEAEQQLSE-----          | 949  |
| Trout csf-1ra1 | PDFAPPEMYTIMKMCWNLEPTERTPTFSKISQMLIERLLGEEPERPDQCSLPSQHQHNIQLQDMVVEELCDDND---       | 964  |
| Trout csf-1ra2 | PDFAPPEMYTIMKMCWNLEPTERTPTFSKISQMLIERVLGEQPEHLD-----QQYQNIQ---QDMVIEELEPCDDDDDKTK   | 999  |
| Trout csf-1rb2 | PDFAPPEIYTIMKMCWNLEPTERTPTFSTIGQLIQLSLL---PDQPD-----QTYRNVQ---DKTPRQESGEQSQAKI-     | 940  |
| Trout csf-1rb1 | PDFAPPEIYTIMKMCWNLEPTERTPTFSTIGQLIQLLL---PDQPD-----HTYRNVQ---DKTPRQESGEQSQAKI-      | 952  |
| Human          | LEEESSEHLTCCEQDIAQPL-LQPNNYQFC                                                      | 972  |
| Mouse          | PEEESSEHLACCEPDIAQPL-LQPNNYQFC                                                      | 977  |
| Zebrafish      | HEDESFE---SCDQEEEDQPL-MKPNNYQFC                                                     | 977  |
| Trout csf-1ra1 | CCDGSQDQ---SCEHEEEEDQPL-VKTNNYQFC                                                   | 992  |
| Trout csf-1ra2 | FCDGSQDQ---SCEHEEEEDQPL-MKTNNYQFC                                                   | 1027 |
| Trout csf-1rb2 | --SEDQDQ---TLNHEEEEDQPLMMRNNNYQIC                                                   | 967  |
| Trout csf-1rb1 | --NGDCEQ---TLNQEGEEEDQPL-MKNNNYQFC                                                  | 978  |

**Figure S2.** The whole sequence alignment of CSF-1R among mammals and teleosts. The signal peptides, transmembrane domains and conserved tyrosine residues are highlighted.

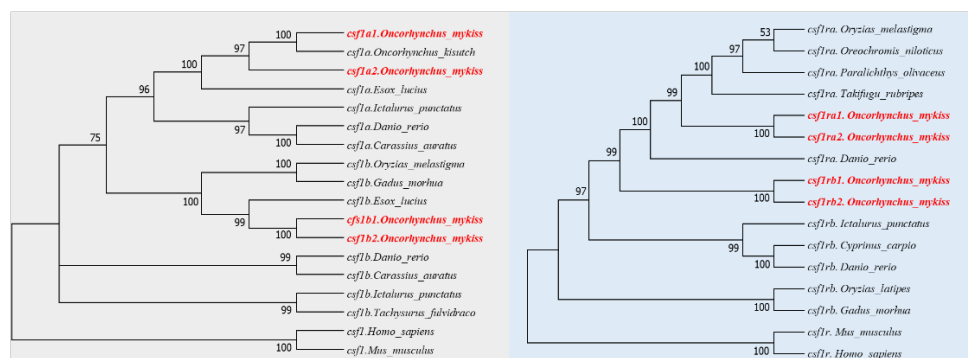

**Figure S3.** Evolutionary relationships of CSF-1 and CSF-1R.

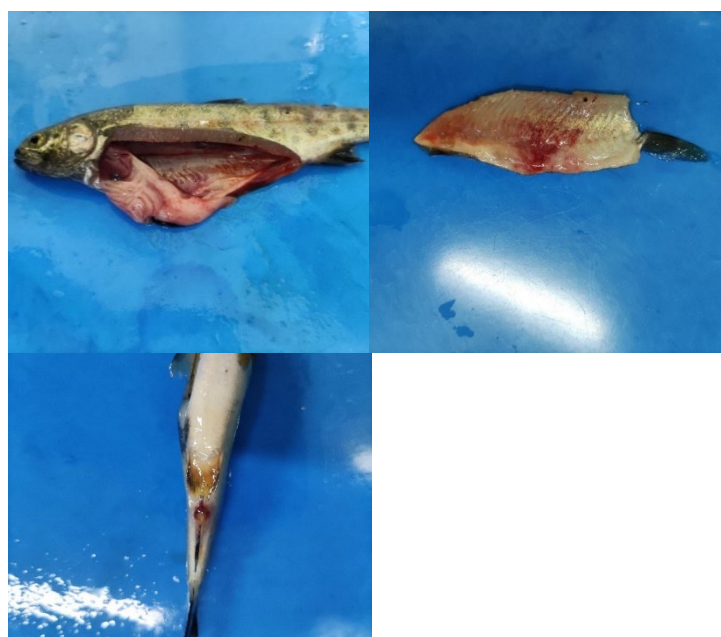

**Figure S4.** Furunculosis symptoms: Intestine hyperaemia; Muscle fester; Anus become red and turgescence, extrudes out.

**Table S1.** The primers for qPCR validation.

| Primer name     | Forward primer (5'-3')    | Reverse primer (5'-3') |
|-----------------|---------------------------|------------------------|
| <i>tnfa</i>     | GGGGAACCAAATCCTCAT        | GGACTCAGCATCACCGTAG    |
| <i>il1β</i>     | AGGACCTGCTCAACTTCTT       | ACCCAGCACTTGTCTCA      |
| <i>il8</i>      | CTCAAGATACAAACCAAATAAG    | AACCGACTGTCTTTTCAC     |
| <i>olfm5</i>    | AAAACCTGCCTTCTACAGCAAA    | TACCCACGGCACACTGAAAC   |
| <i>ccl19a</i>   | CTCTGACAGGGACCTTAGGGA     | TCACTACCAGGAGGGGAGTC   |
| <i>csf3r</i>    | GGAACGCTGCAGGGACAT        | CACACCACCACATAGCCTGT   |
| <i>lyz2</i>     | GCATCCGGAATGGATGGCTA      | CAGCGGATACCACAGACGTT   |
| <i>mrp1</i>     | TGGAGGGTTGGTTATTAGG       | AGGAAGAAAGGTCCGAAG     |
| <i>lect2</i>    | GCTGTTCTTTTGTCTTACTGTGGTG | TGTCCTTGTCCCCATCTGTC   |
| <i>hmgcs1</i>   | CCTGGTCAACTCCACCACAG      | TCCCCATTGCTAACGGTGAC   |
| <i>il13ra2b</i> | AGCAGATGTTGAAGCAGAGGAATG  | ACACAAAACCAGGAGGTTGC   |
| <i>il13ra1b</i> | ACCCTGGTGAATCCCACAAA      | ACACACCCGGAAGGTTTCT    |
| <i>fos</i>      | GCCTGAGGAGGAGGAGAAGA      | CCATGGGAGGGAGAGATGGA   |
| <i>β actin</i>  | GATGGGCCAGAAAGACAGCTA     | TCGTCCCAGTTGGTGACGAT   |

**Table S2.** The DEG lists of Figure 2 (Up-regulated in IT).

| Gene id (NCBI) | Base Mean CT | Base Mean IT | log <sub>2</sub> FC | p val   | padj    | Gene symbol      |
|----------------|--------------|--------------|---------------------|---------|---------|------------------|
| <b>Brain</b>   |              |              |                     |         |         |                  |
| LOC100136187   | 0.000        | 49.699       | Inf                 | 0.00000 | 0.00000 |                  |
| LOC118941484   | 0.000        | 14.976       | Inf                 | 0.00012 | 0.05927 |                  |
| LOC118964931   | 0.000        | 126.631      | Inf                 | 0.01658 | 0.83024 | <i>saa3</i>      |
| LOC118936275   | 0.305        | 46.651       | 7.259               | 0.00000 | 0.00000 |                  |
| <i>acod1</i>   | 0.305        | 35.963       | 6.883               | 0.00090 | 0.21826 | <i>acod1</i>     |
| LOC110530481   | 0.374        | 37.718       | 6.658               | 0.00117 | 0.23514 |                  |
| LOC110496224   | 34.882       | 1151.884     | 5.045               | 0.02758 | 0.94987 | ( <i>h2-q9</i> ) |
| LOC110509875   | 1.431        | 39.826       | 4.799               | 0.00000 | 0.00068 |                  |

|                          |         |          |       |         |         |                        |
|--------------------------|---------|----------|-------|---------|---------|------------------------|
| LOC110536048             | 0.678   | 16.068   | 4.566 | 0.00079 | 0.20339 | <i>sds</i>             |
| LOC110518069             | 0.647   | 14.632   | 4.500 | 0.00203 | 0.33134 | <i>gvin1</i>           |
| <i>ccl19a.1</i>          | 0.715   | 14.847   | 4.375 | 0.04152 | 1.00000 | <i>ccl19</i>           |
| LOC110531529             | 1.399   | 23.232   | 4.053 | 0.00175 | 0.29805 | <i>mefv</i>            |
| LOC110497998             | 86.342  | 1155.330 | 3.742 | 0.00000 | 0.00000 |                        |
| LOC110510403             | 2.239   | 29.482   | 3.719 | 0.00437 | 0.48474 | <i>mfap4</i>           |
| <i>si:ch211-284e13.9</i> | 1.020   | 11.138   | 3.449 | 0.01890 | 0.86259 |                        |
| <i>tymp</i>              | 2.109   | 21.549   | 3.353 | 0.00082 | 0.20807 | <i>tymp</i>            |
| LOC118936255             | 26.389  | 263.495  | 3.320 | 0.03877 | 1.00000 |                        |
| LOC110488725             | 1.057   | 9.914    | 3.229 | 0.03087 | 0.97010 | <i>ffar3</i>           |
| LOC110538203             | 4.397   | 36.363   | 3.048 | 0.00299 | 0.41037 | <i>c1ql2</i>           |
| <i>lect2</i>             | 9.238   | 74.298   | 3.008 | 0.00000 | 0.00013 | <i>lect2</i>           |
| LOC110531659             | 1.399   | 10.404   | 2.894 | 0.03694 | 0.99944 | <i>gvin1</i>           |
| LOC118964557             | 36.875  | 232.430  | 2.656 | 0.00001 | 0.01288 |                        |
| LOC110519256             | 2.115   | 12.174   | 2.525 | 0.03812 | 1.00000 | <i>calhm6</i>          |
| LOC110537685             | 2.414   | 12.678   | 2.393 | 0.04499 | 1.00000 | <i>h2-aa (ha2q)</i>    |
| LOC110528546             | 46.779  | 207.095  | 2.146 | 0.01160 | 0.72429 | <i>rnf213a</i>         |
| LOC110498757             | 11.875  | 49.649   | 2.064 | 0.00091 | 0.21826 | <i>fmnl1</i>           |
| LOC110536323             | 4.236   | 17.514   | 2.048 | 0.03997 | 1.00000 | <i>ggh</i>             |
| LOC110525408             | 18.276  | 69.979   | 1.937 | 0.00056 | 0.16298 | <i>gda</i>             |
| LOC110510228             | 31.045  | 109.693  | 1.821 | 0.00001 | 0.01077 |                        |
| LOC110507168             | 10.534  | 36.403   | 1.789 | 0.00528 | 0.51532 |                        |
| <i>hsp47</i>             | 100.960 | 332.702  | 1.720 | 0.02298 | 0.90994 | <i>serpinh1</i>        |
| LOC110528445             | 29.766  | 97.128   | 1.706 | 0.00578 | 0.53427 | <i>ifi44</i>           |
| LOC110495727             | 22.788  | 70.774   | 1.635 | 0.02985 | 0.96324 | <i>ifi44l</i>          |
| LOC110518874             | 41.177  | 125.093  | 1.603 | 0.00009 | 0.04523 | <i>ube2d4</i>          |
| LOC110533568             | 7.980   | 23.959   | 1.586 | 0.04443 | 1.00000 | <i>derl2</i>           |
| LOC110536252             | 50.895  | 145.633  | 1.517 | 0.00230 | 0.35705 | <i>s100a1</i>          |
| LOC110533271             | 27.138  | 75.887   | 1.484 | 0.00173 | 0.29805 |                        |
| LOC110524047             | 57.086  | 153.129  | 1.424 | 0.01794 | 0.85211 | <i>lgals3bpb</i>       |
| LOC110536449             | 36.149  | 92.257   | 1.352 | 0.00903 | 0.64724 | <i>ccl21</i>           |
| LOC118944410             | 86.092  | 215.650  | 1.325 | 0.00003 | 0.02171 | <i>khdc4</i>           |
| LOC100136325             | 12.548  | 30.690   | 1.290 | 0.04838 | 1.00000 | <i>tapbp (tapasin)</i> |
| LOC110487423             | 76.572  | 174.198  | 1.186 | 0.01325 | 0.76473 | <i>gys1</i>            |
| LOC110523157             | 100.732 | 226.009  | 1.166 | 0.00385 | 0.46046 |                        |
| LOC110535266             | 42.342  | 89.439   | 1.079 | 0.03356 | 0.98729 | <i>btn1a1</i>          |
| LOC110488737             | 23.903  | 50.072   | 1.067 | 0.04936 | 1.00000 | <i>aip1</i>            |
| LOC110533231             | 849.230 | 1723.481 | 1.021 | 0.00002 | 0.01895 | <i>banf1</i>           |
| <b>Kidney</b>            |         |          |       |         |         |                        |
| <i>ccl19a.1</i>          | 217.748 | 1501.344 | 2.786 | 0.00000 | 0.00044 | <i>ccl19</i>           |
| <i>hsp47</i>             | 346.565 | 713.408  | 1.042 | 0.02781 | 1.00000 | <i>serpinh1</i>        |
| <i>lect2</i>             | 926.671 | 6569.135 | 2.826 | 0.00001 | 0.01923 | <i>lect2</i>           |
| LOC100136187             | 0.296   | 36.674   | 6.954 | 0.00000 | 0.00045 |                        |
| LOC100136325             | 28.663  | 76.644   | 1.419 | 0.02815 | 1.00000 | <i>tapbp (tapasin)</i> |
| LOC110487423             | 41.075  | 122.236  | 1.573 | 0.00577 | 1.00000 | <i>gys1</i>            |
| LOC110488725             | 21.339  | 576.671  | 4.756 | 0.00000 | 0.00000 | <i>ffar3</i>           |
| LOC110488737             | 0.000   | 10.006   | Inf   | 0.00496 | 1.00000 | <i>aip1</i>            |

|                          |          |           |       |         |         |                     |
|--------------------------|----------|-----------|-------|---------|---------|---------------------|
| LOC110495727             | 49.625   | 126.489   | 1.350 | 0.02732 | 1.00000 | <i>ifi44l</i>       |
| LOC110496224             | 618.390  | 11632.005 | 4.233 | 0.00184 | 0.69673 | ( <i>h2-q9</i> )    |
| LOC110497998             | 185.380  | 876.761   | 2.242 | 0.00002 | 0.02850 |                     |
| LOC110498757             | 20.182   | 59.316    | 1.555 | 0.04273 | 1.00000 | <i>fmnl1</i>        |
| LOC110507168             | 18.934   | 57.298    | 1.597 | 0.01810 | 1.00000 |                     |
| LOC110509875             | 591.418  | 3992.750  | 2.755 | 0.00020 | 0.16403 |                     |
| LOC110510228             | 275.360  | 914.445   | 1.732 | 0.00040 | 0.26609 |                     |
| LOC110510403             | 2.618    | 55.487    | 4.406 | 0.00002 | 0.03049 | <i>mfap4</i>        |
| LOC110518069             | 0.296    | 30.599    | 6.692 | 0.02602 | 1.00000 | <i>gvin1</i>        |
| LOC110518874             | 27.943   | 109.648   | 1.972 | 0.00126 | 0.59625 | <i>ube2d4</i>       |
| LOC110519256             | 37.552   | 138.306   | 1.881 | 0.00129 | 0.59625 | <i>calhm6</i>       |
| LOC110523157             | 3273.788 | 7360.237  | 1.169 | 0.01999 | 1.00000 |                     |
| LOC110524047             | 24.150   | 123.280   | 2.352 | 0.00248 | 0.85915 | <i>lgals3bpb</i>    |
| LOC110525408             | 110.593  | 242.425   | 1.132 | 0.03570 | 1.00000 | <i>gda</i>          |
| LOC110528445             | 240.985  | 1478.582  | 2.617 | 0.00449 | 1.00000 | <i>ifi44</i>        |
| LOC110528546             | 548.738  | 1124.281  | 1.035 | 0.04809 | 1.00000 | <i>rnf213a</i>      |
| LOC110530481             | 2.537    | 106.165   | 5.387 | 0.00000 | 0.00016 |                     |
| LOC110531529             | 12.191   | 83.891    | 2.783 | 0.00252 | 0.85915 | <i>mevo</i>         |
| LOC110531659             | 13.425   | 114.681   | 3.095 | 0.01060 | 1.00000 | <i>gvin1</i>        |
| LOC110533231             | 3718.752 | 10476.705 | 1.494 | 0.03067 | 1.00000 | <i>banf1</i>        |
| LOC110533271             | 48.931   | 238.782   | 2.287 | 0.00005 | 0.05213 |                     |
| LOC110533568             | 153.676  | 330.878   | 1.106 | 0.03381 | 1.00000 | <i>derl2</i>        |
| LOC110535266             | 33.709   | 102.453   | 1.604 | 0.01276 | 1.00000 | <i>btn1a1</i>       |
| LOC110536048             | 75.746   | 1978.947  | 4.707 | 0.00000 | 0.00000 | <i>sds</i>          |
| LOC110536252             | 100.255  | 319.266   | 1.671 | 0.00207 | 0.75392 | <i>s100a1</i>       |
| LOC110536323             | 223.688  | 646.496   | 1.531 | 0.00348 | 1.00000 | <i>ggh</i>          |
| LOC110536449             | 274.995  | 663.221   | 1.270 | 0.01332 | 1.00000 | <i>ccl21</i>        |
| LOC110537685             | 96.738   | 265.734   | 1.458 | 0.00820 | 1.00000 | <i>h2-aa (ha2q)</i> |
| LOC110538203             | 47.554   | 689.064   | 3.857 | 0.00000 | 0.00000 | <i>c1ql2</i>        |
| LOC118936255             | 79.079   | 1450.103  | 4.197 | 0.00004 | 0.04527 |                     |
| LOC118936275             | 0.353    | 50.706    | 7.168 | 0.00000 | 0.00001 |                     |
| LOC118941484             | 0.000    | 31.860    | Inf   | 0.00044 | 0.28330 |                     |
| LOC118944410             | 89.102   | 215.395   | 1.273 | 0.02804 | 1.00000 | <i>khdc4</i>        |
| LOC118964557             | 854.417  | 3990.971  | 2.224 | 0.00853 | 1.00000 |                     |
| LOC118964931             | 6.541    | 143.909   | 4.460 | 0.00021 | 0.16452 | <i>saa3</i>         |
| <i>si:ch211-284e13.9</i> | 70.320   | 211.406   | 1.588 | 0.00509 | 1.00000 |                     |
| <i>tymp</i>              | 68.092   | 236.540   | 1.797 | 0.00173 | 0.68675 | <i>tymp</i>         |

Table S3. The DEG lists of Figure 2 (Down-regulated in IT).

| Gene id (NCBI) | Base Mean CT | Base Mean IT | log <sub>2</sub> FC | p val   | padj    | Gene symbol  |
|----------------|--------------|--------------|---------------------|---------|---------|--------------|
| Brain          |              |              |                     |         |         |              |
| LOC110485559   | 31.98858     | 4.92125      | -2.700              | 0.00040 | 0.13441 | <i>pdgfa</i> |
| LOC110522641   | 383.38639    | 130.20371    | -1.558              | 0.03667 | 0.99696 | <i>fos</i>   |
| LOC110529274   | 231.64694    | 105.36848    | -1.136              | 0.02661 | 0.93851 | <i>fos</i>   |

|               |           |          |        |         |         |               |
|---------------|-----------|----------|--------|---------|---------|---------------|
| LOC110538343  | 32.77868  | 6.14627  | -2.415 | 0.00103 | 0.22611 | <i>gimap4</i> |
| LOC118937699  | 99.29079  | 23.54994 | -2.076 | 0.00000 | 0.00612 |               |
| <b>Kidney</b> |           |          |        |         |         |               |
| LOC110485559  | 90.63801  | 26.82252 | -1.757 | 0.03644 | 1.00000 | <i>pdgfa</i>  |
| LOC110522641  | 569.23223 | 84.55087 | -2.751 | 0.01721 | 1.00000 | <i>fos</i>    |
| LOC110529274  | 475.64288 | 86.26071 | -2.463 | 0.01527 | 1.00000 | <i>fos</i>    |
| LOC110538343  | 94.24856  | 11.68663 | -3.012 | 0.00001 | 0.01638 | <i>gimap4</i> |
| LOC118937699  | 191.615   | 59.700   | -1.682 | 0.00202 | 0.75037 |               |

**Table S4.** The enriched GO terms and KEGG pathway lists of Figure 2 ~ 4.

| Term                                                                                  | Function description                                                   |                    | Up- or downregulation |
|---------------------------------------------------------------------------------------|------------------------------------------------------------------------|--------------------|-----------------------|
| <b>The enriched GO terms that are share in comparisons of IB vs. CB and IK vs. CK</b> |                                                                        |                    |                       |
| GO:0045087                                                                            | innate immune response                                                 | biological process | Up                    |
| GO:0006955                                                                            | immune response                                                        | biological process | Up                    |
| GO:0006953                                                                            | acute-phase response                                                   | biological process | Up                    |
| GO:0051607                                                                            | defense response to virus                                              | biological process | Up                    |
| GO:0042742                                                                            | defense response to bacterium                                          | biological process | Up                    |
| GO:0006954                                                                            | inflammatory response                                                  | biological process | Up                    |
| <b>The enriched GO terms that are specifically identified in IB vs. CB</b>            |                                                                        |                    |                       |
| GO:0003796                                                                            | lysozyme activity                                                      | molecular function | Up                    |
| GO:0002474                                                                            | antigen processing and presentation of peptide antigen via MHC class I | biological process | Up                    |
| GO:0045824                                                                            | negative regulation of innate immune response                          | biological process | Up                    |
| GO:0048266                                                                            | behavioral response to pain                                            | biological process | Up                    |
| GO:0002755                                                                            | MyD88-dependent toll-like receptor signaling pathway                   | biological process | Up                    |
| GO:2000379                                                                            | positive regulation of reactive oxygen species metabolic process       | biological process | Up                    |
| GO:0071356                                                                            | cellular response to tumor necrosis factor                             | biological process | Up                    |
| GO:0006952                                                                            | defense response                                                       | biological process | Up                    |
| GO:0032088                                                                            | negative regulation of NF-kappaB transcription factor activity         | biological process | Up                    |
| GO:0071346                                                                            | cellular response to interferon-gamma                                  | biological process | Up                    |
| GO:0050728                                                                            | negative regulation of inflammatory response                           | biological process | Up                    |
| GO:0042612                                                                            | MHC class I protein complex                                            | cellular component | Up                    |

|                                                                            |                                                                           |                    |      |
|----------------------------------------------------------------------------|---------------------------------------------------------------------------|--------------------|------|
| GO:007122                                                                  | cellular response to lipopolysaccharide                                   | Biological process | Up   |
| GO:0099160                                                                 | postsynaptic intermediate filament cytoskeleton                           | cellular component | Down |
| GO:0099182                                                                 | presynaptic intermediate filament cytoskeleton                            | cellular component | Down |
| GO:0099184                                                                 | structural constituent of postsynaptic intermediate filament cytoskeleton | molecular function | Down |
| GO:0005344                                                                 | oxygen carrier activity                                                   | molecular function | Down |
| GO:0014012                                                                 | peripheral nervous system axon regeneration                               | biological process | Down |
| GO:0019825                                                                 | oxygen binding                                                            | molecular function | Down |
| GO:0019896                                                                 | axonal transport of mitochondrion                                         | biological process | Down |
| GO:0098981                                                                 | cholinergic synapse                                                       | cellular component | Down |
| GO:0060074                                                                 | synapse maturation                                                        | biological process | Down |
| GO:1904115                                                                 | axon cytoplasm                                                            | cellular component | Down |
| GO:0021510                                                                 | spinal cord development                                                   | biological process | Down |
| GO:0048812                                                                 | neuron projection morphogenesis                                           | biological process | Down |
| GO:0007218                                                                 | neuropeptide signaling pathway                                            | biological process | Down |
| GO:0043524                                                                 | negative regulation of neuron apoptotic process                           | biological process | Down |
| GO:0051301                                                                 | cell division                                                             | biological process | Down |
| GO:0007059                                                                 | chromosome segregation                                                    | biological process | Down |
| GO:0000777                                                                 | condensed chromosome kinetochore                                          | cellular component | Down |
| GO:0007049                                                                 | cell cycle                                                                | biological process | Down |
| GO:0006695                                                                 | cholesterol biosynthetic process                                          | biological process | Down |
| GO:0046872                                                                 | metal ion binding                                                         | molecular function | Down |
| <b>The enriched GO terms that are specifically identified in IK vs. CK</b> |                                                                           |                    |      |
| GO:0034987                                                                 | immunoglobulin receptor binding                                           | molecular function | Up   |
| GO:0048247                                                                 | lymphocyte chemotaxis                                                     | biological process | Up   |
| GO:0034097                                                                 | response to cytokine                                                      | biological process | Up   |
| GO:0003823                                                                 | antigen binding                                                           | molecular function | Up   |

|                |                                                                                   |                         |      |
|----------------|-----------------------------------------------------------------------------------|-------------------------|------|
| GO:00027<br>20 | positive regulation of cytokine production involved in im-<br>mune response       | biological pro-<br>cess | Up   |
| GO:00028<br>79 | positive regulation of acute inflammatory response to non-an-<br>tigenic stimulus | biological pro-<br>cess | Up   |
| GO:00902<br>76 | regulation of peptide hormone secretion                                           | biological pro-<br>cess | Up   |
| GO:00305<br>93 | neutrophil chemotaxis                                                             | biological pro-<br>cess | Up   |
| GO:00713<br>47 | cellular response to interleukin-1                                                | biological pro-<br>cess | Up   |
| GO:00023<br>85 | mucosal immune response                                                           | biological pro-<br>cess | Up   |
| GO:00140<br>61 | regulation of norepinephrine secretion                                            | biological pro-<br>cess | Up   |
| GO:00069<br>58 | complement activation, classical pathway                                          | biological pro-<br>cess | Up   |
| GO:00702<br>66 | necroptotic process                                                               | biological pro-<br>cess | Up   |
| GO:00618<br>44 | antimicrobial humoral immune response mediated by antimi-<br>crobial peptide      | biological pro-<br>cess | Up   |
| GO:00018<br>16 | cytokine production                                                               | biological pro-<br>cess | Up   |
| GO:00096<br>17 | response to bacterium                                                             | biological pro-<br>cess | Up   |
| GO:00022<br>50 | adaptive immune response                                                          | biological pro-<br>cess | Up   |
| GO:00053<br>28 | neurotransmitter: sodium symporter activity                                       | molecular<br>function   | Down |
| GO:00072<br>69 | neurotransmitter secretion                                                        | biological pro-<br>cess | Down |
| GO:00481<br>67 | regulation of synaptic plasticity                                                 | biological pro-<br>cess | Down |
| GO:00171<br>57 | regulation of exocytosis                                                          | biological pro-<br>cess | Down |
| GO:00080<br>21 | synaptic vesicle                                                                  | cellular compo-<br>nent | Down |
| GO:00427<br>34 | presynaptic membrane                                                              | cellular compo-<br>nent | Down |
| GO:00072<br>68 | chemical synaptic transmission                                                    | biological pro-<br>cess | Down |
| GO:00987<br>94 | postsynapse                                                                       | cellular compo-<br>nent | Down |
| GO:00073<br>99 | nervous system development                                                        | biological pro-<br>cess | Down |

**The enriched KEGG pathway that are share in comparisons of IB vs. CB and IK vs. CK**

|         |                                           |    |
|---------|-------------------------------------------|----|
| ko04145 | Phagosome                                 | Up |
| ko04612 | Antigen processing and presentation       | Up |
| ko04650 | Natural killer cell mediated cytotoxicity | Up |
| ko04610 | Complement and coagulation cascades       | Up |
| ko04917 | Prolactin signaling pathway               | Up |
| ko04620 | Toll-like receptor signaling pathway      | Up |



|                                                                                |                                         |      |
|--------------------------------------------------------------------------------|-----------------------------------------|------|
| ko04668                                                                        | TNF signaling pathway                   | Up   |
| <b>The enriched KEGG pathway that are specifically identified in IB vs. CB</b> |                                         |      |
| ko04670                                                                        | Leukocyte transendothelial migration    | Up   |
| ko04664                                                                        | Fc epsilon RI signaling pathway         | Up   |
| ko04666                                                                        | Fc gamma R-mediated phagocytosis        | Up   |
| ko04611                                                                        | Platelet activation                     | Up   |
| ko04662                                                                        | B cell receptor signaling pathway       | Up   |
| ko04066                                                                        | HIF-1 signaling pathway                 | Up   |
| ko04726                                                                        | Serotonergic synapse                    | Up   |
| ko04725                                                                        | Cholinergic synapse                     | Up   |
| ko04723                                                                        | Retrograde endocannabinoid signaling    | Up   |
| ko04925                                                                        | Aldosterone synthesis and secretion     | Up   |
| ko04912                                                                        | GnRH signaling pathway                  | Up   |
| ko04660                                                                        | T cell receptor signaling pathway       | Up   |
| ko04744                                                                        | Phototransduction                       | Up   |
| ko04713                                                                        | Circadian entrainment                   | Up   |
| ko04115                                                                        | p53 signaling pathway                   | Down |
| ko04110                                                                        | Cell cycle                              | Down |
| ko03030                                                                        | DNA replication                         | Down |
| ko00100                                                                        | Steroid biosynthesis                    | Down |
| ko04114                                                                        | Oocyte meiosis                          | Down |
| ko04914                                                                        | Progesterone-mediated oocyte maturation | Down |
| <b>The enriched KEGG pathway that are specifically identified in IK vs. CK</b> |                                         |      |
| ko04621                                                                        | NOD-like receptor signaling pathway     | Up   |
| ko04060                                                                        | Cytokine-cytokine receptor interaction  | Up   |
| ko04064                                                                        | NF-kappa B signaling pathway            | Up   |
| ko04622                                                                        | RIG-I-like receptor signaling pathway   | Up   |
| ko04640                                                                        | Hematopoietic cell lineage              | Up   |
| ko04915                                                                        | Estrogen signaling pathway              | Up   |
| ko04978                                                                        | Mineral absorption                      | Up   |
| ko04918                                                                        | Thyroid hormone synthesis               | Up   |
| ko04727                                                                        | GABAergic synapse                       | Up   |
| ko04910                                                                        | Insulin signaling pathway               | Up   |
| ko04911                                                                        | Insulin secretion                       | Up   |

Table S5. Up-regulated genes enriched in GO terms and KEGG pathway of Figure 3.

| Gene id (NCBI)     | Base Mean<br>CT | Base Mean<br>IT | log <sub>2</sub> FC | p val    | Gene symbol   |
|--------------------|-----------------|-----------------|---------------------|----------|---------------|
| <b>in GO terms</b> |                 |                 |                     |          |               |
| <i>acod1</i>       | 0.304638        | 35.96333        | 6.883289            | 0.000902 | <i>acod1</i>  |
| <i>ifit8</i>       | 3.534241        | 17.48511        | 2.306655            | 0.018691 | <i>ifit5</i>  |
| LOC110488725       | 1.057425        | 9.913805        | 3.228883            | 0.030871 | <i>ffar3</i>  |
| LOC110489027       | 1.629379        | 16.194          | 3.313065            | 0.004869 | <i>c3</i>     |
| LOC110491319       | 15.14044        | 67.56694        | 2.15791             | 6.34E-05 | <i>unc13d</i> |
| LOC110491891       | 64.63644        | 386.686         | 2.580743            | 0.00016  | <i>b2m</i>    |
| LOC110492590       | 2.103307        | 14.90984        | 2.825533            | 0.012482 | <i>cd163</i>  |
| LOC110495707       | 4.103801        | 19.61543        | 2.256956            | 0.020349 | <i>c1qa</i>   |
| LOC110497949       | 11.49086        | 51.78458        | 2.172036            | 0.000151 | <i>thbs1</i>  |
| LOC110498119       | 1.025876        | 13.35407        | 3.702351            | 0.006591 | <i>rsad2</i>  |

|                          |          |          |          |          |                |
|--------------------------|----------|----------|----------|----------|----------------|
| LOC110505949             | 4.959402 | 32.91499 | 2.730507 | 0.000931 | <i>trbc2</i>   |
| LOC110515930             | 0.304638 | 10.79707 | 5.147402 | 0.005205 | <i>a2m</i>     |
| LOC110520614             | 6.876792 | 36.5034  | 2.408223 | 0.000751 | <i>tlr8</i>    |
| LOC110528067             | 0.678146 | 14.19384 | 4.387526 | 0.015416 | <i>vwa1</i>    |
| LOC110537685             | 2.413717 | 12.67837 | 2.393041 | 0.044989 | <i>h2-aa</i>   |
| LOC118937842             | 1.255871 | 10.24398 | 3.028016 | 0.042204 | <i>nlrc3</i>   |
| <i>nos2</i>              | 3.08609  | 20.96712 | 2.764277 | 0.003582 | <i>nos2</i>    |
| <i>si:dkey-195m11.11</i> | 0.988555 | 9.664806 | 3.289348 | 0.035716 | <i>cd163</i>   |
| <i>tlr9</i>              | 1.051654 | 9.869169 | 3.230269 | 0.031189 | <i>tlr7</i>    |
| LOC110491319             | 15.14044 | 67.56694 | 2.15791  | 6.34E-05 | <i>unc13d</i>  |
| <b>in KEGG pathways</b>  |          |          |          |          |                |
| <i>gngt2a</i>            | 1.523188 | 12.41836 | 3.027308 | 0.026902 | <i>gngt2</i>   |
| <i>jak3</i>              | 15.90028 | 38.39951 | 1.272036 | 0.043242 | <i>jak2</i>    |
| LOC110485801             | 5.287424 | 36.02103 | 2.768203 | 0.000204 | <i>pik3r5</i>  |
| LOC110486935             | 7.272699 | 56.242   | 2.951085 | 1.30E-05 | <i>gng12</i>   |
| LOC110493519             | 34.23848 | 72.3873  | 1.080118 | 0.024575 | <i>kcnq5</i>   |
| LOC110494246             | 131.9688 | 279.1713 | 1.080954 | 0.037597 | <i>itpr1</i>   |
| LOC110495697             | 161.0023 | 336.8698 | 1.06511  | 0.000277 | <i>pld1</i>    |
| LOC110495726             | 449.8679 | 924.9141 | 1.039818 | 4.25E-05 | <i>gng7</i>    |
| LOC110496638             | 0.304638 | 89.26498 | 8.194857 | 0.034149 | <i>gngt1</i>   |
| LOC110497890             | 28.796   | 86.73426 | 1.590734 | 0.000391 | <i>mapk12</i>  |
| LOC110502637             | 37.24137 | 74.67651 | 1.003748 | 0.025202 | <i>alox5</i>   |
| LOC110503405             | 61.2139  | 153.9605 | 1.330629 | 0.024313 | <i>pde2a</i>   |
| LOC110505765             | 33.56828 | 100.9605 | 1.588621 | 0.010053 | <i>prkd1</i>   |
| LOC110524068             | 35.54253 | 81.87587 | 1.203892 | 0.015134 | <i>faah</i>    |
| LOC110525837             | 30.57188 | 64.14236 | 1.069072 | 0.02641  | <i>htr7</i>    |
| LOC110528134             | 52.63318 | 111.8913 | 1.088053 | 0.006341 | <i>prkcd</i>   |
| LOC110531171             | 75.93813 | 154.1699 | 1.021624 | 0.003823 | <i>cacna1d</i> |
| LOC110531219             | 17.04996 | 60.71047 | 1.832177 | 0.00083  | <i>cacna1d</i> |
| LOC110537357             | 6.149781 | 26.90875 | 2.129468 | 0.008356 | <i>pde2a</i>   |
| LOC110538505             | 11.97423 | 40.40776 | 1.754699 | 0.005454 | <i>pik3r5</i>  |
| <i>prkd1</i>             | 34.04948 | 193.9495 | 2.509976 | 3.34E-05 | <i>prkd1</i>   |
| <i>ptk2ba</i>            | 34.92987 | 73.72918 | 1.077774 | 0.014699 | <i>ptk2b</i>   |
| <i>socs2</i>             | 26.47722 | 72.8111  | 1.459406 | 0.017787 | <i>socs2</i>   |
| <i>socs3</i>             | 33.35303 | 94.01622 | 1.495092 | 0.001735 | <i>socs3</i>   |
| <i>stat1b</i>            | 60.39384 | 148.5998 | 1.298959 | 0.01594  | <i>stat1</i>   |
| <i>stat5</i>             | 15.44298 | 37.302   | 1.272302 | 0.042098 | <i>stat5b</i>  |

Table S6. Down-regulated genes enriched in GO terms and KEGG pathway of Figure 3.

| Gene id (NCBI)     | Base Mean CT | Base Mean IT | log <sub>2</sub> FC | p val    | Gene symbol    |
|--------------------|--------------|--------------|---------------------|----------|----------------|
| <b>in GO terms</b> |              |              |                     |          |                |
| <i>aurka</i>       | 96.39547     | 24.08476     | -2.00084            | 0.031522 | <i>aurka-a</i> |
| <i>birc5a</i>      | 124.5477     | 35.22157     | -1.82217            | 0.03548  | <i>birc5.2</i> |
| LOC100136207       | 1394.917     | 226.6463     | -2.62166            | 5.50E-05 | <i>hbb1</i>    |
| LOC110486354       | 2023.676     | 386.8942     | -2.38697            | 0.000196 | <i>hba</i>     |
| LOC110487060       | 28.80656     | 4.494836     | -2.68006            | 0.001569 | <i>cenpx</i>   |

|                         |          |          |          |          |                 |
|-------------------------|----------|----------|----------|----------|-----------------|
| LOC110495728            | 102.2698 | 10.71938 | -3.25409 | 0.042718 | <i>cartpt</i>   |
| LOC110496244            | 64.78847 | 15.8221  | -2.0338  | 0.01422  | <i>cenpa</i>    |
| LOC110499168            | 67.04956 | 10.2889  | -2.70414 | 0.047532 | <i>hba2</i>     |
| LOC110499816            | 206.1175 | 50.7103  | -2.02312 | 0.014788 | <i>aurkb</i>    |
| LOC110502544            | 95.92056 | 23.20092 | -2.04766 | 0.028349 | <i>kif11</i>    |
| LOC110505148            | 120.6956 | 33.6455  | -1.84289 | 0.044724 | <i>ccna2</i>    |
| LOC110505614            | 91.29734 | 24.21404 | -1.91473 | 0.045665 | <i>tacc3</i>    |
| LOC110514239            | 21.28077 | 2.895006 | -2.87791 | 0.003199 | <i>melk</i>     |
| LOC110514629            | 16.88755 | 2.349169 | -2.84574 | 0.007868 | <i>melk</i>     |
| LOC110520448            | 82.39218 | 23.10382 | -1.83438 | 0.041492 | <i>chaf1b</i>   |
| LOC110525629            | 733.1227 | 220.2491 | -1.73492 | 7.54E-05 | <i>nefl</i>     |
| LOC110538445            | 924.5028 | 279.4327 | -1.72618 | 3.02E-05 | <i>hbb</i>      |
| <i>mis12</i>            | 51.37544 | 14.14109 | -1.86119 | 0.026337 | <i>mis12</i>    |
| <i>ncaph</i>            | 136.9341 | 39.98453 | -1.77597 | 0.037188 | <i>ncaph</i>    |
| <i>ska1</i>             | 58.01168 | 18.32026 | -1.6629  | 0.031179 | <i>ska1</i>     |
| <b>in KEGG pathways</b> |          |          |          |          |                 |
| <i>aurka</i>            | 96.39547 | 24.08476 | -2.00084 | 0.031522 | <i>aurka-a</i>  |
| <i>bub1bb</i>           | 85.12605 | 38.72676 | -1.13627 | 0.030659 | <i>bub1b</i>    |
| <i>cdk2</i>             | 189.8055 | 93.95335 | -1.01451 | 0.029891 | <i>cdk2</i>     |
| <i>fdft1</i>            | 2166.652 | 1015.099 | -1.09385 | 4.88E-06 | <i>fdft1</i>    |
| <i>gtse1</i>            | 86.84332 | 38.68154 | -1.16677 | 0.011932 | <i>gtse1</i>    |
| LOC110485563            | 411.7358 | 171.028  | -1.26749 | 0.001097 | <i>sqle</i>     |
| LOC110486705            | 38.74127 | 16.80537 | -1.20495 | 0.043341 | <i>ccne2</i>    |
| LOC110488948            | 193.1905 | 64.09482 | -1.59174 | 0.034886 | <i>ccna2</i>    |
| LOC110489156            | 234.3847 | 69.08128 | -1.76251 | 0.027217 | <i>nsdhl</i>    |
| LOC110500729            | 100.6876 | 20.70276 | -2.28199 | 0.004983 | <i>mad2l1</i>   |
| LOC110505148            | 120.6956 | 33.6455  | -1.84289 | 0.044724 | <i>ccna2</i>    |
| LOC110506398            | 440.5589 | 209.6426 | -1.0714  | 9.98E-05 | <i>dhcr7</i>    |
| LOC110521563            | 91.58696 | 39.6538  | -1.20768 | 0.005399 | <i>cdkn2c</i>   |
| LOC110528595            | 203.1449 | 66.03554 | -1.62119 | 0.034943 | <i>mcm2</i>     |
| LOC110530465            | 306.2522 | 137.6075 | -1.15416 | 0.029667 | <i>mcm4</i>     |
| LOC110530628            | 463.0816 | 173.6491 | -1.41509 | 0.037607 | <i>zmcm6-a</i>  |
| LOC118938208            | 54.06651 | 26.91308 | -1.00643 | 0.045186 | <i>rnaseh2a</i> |
| LOC118948701            | 68.70498 | 20.94799 | -1.7136  | 0.000667 | <i>plk1</i>     |
| LOC118951919            | 94.54292 | 19.90907 | -2.24754 | 0.031991 | <i>tsc2</i>     |
| LOC118966114            | 80.4746  | 36.17323 | -1.15361 | 0.011257 | <i>bub3</i>     |
| <i>lss</i>              | 829.4405 | 393.2304 | -1.07676 | 0.000282 | <i>lss</i>      |
| <i>nsdhl</i>            | 601.223  | 238.2784 | -1.33525 | 6.92E-07 | <i>nsdhl</i>    |
| <i>orc5</i>             | 51.0693  | 21.50108 | -1.24805 | 0.018207 | <i>orc5</i>     |
| <i>pttg1</i>            | 64.12554 | 20.9738  | -1.61231 | 0.010738 | <i>pttg1</i>    |
